# Supplementary material for: Structured supervised exercise training or motivational counselling during pregnancy on physical activity level and health of mother and offspring: FitMum study protocol
Source: PubMed Central journal article supplement — BMJ Open. 2021 Mar 19;11(3):e043671. doi: 10.1136/bmjopen-2020-043671 (PMC7986889; doi:10.1136/bmjopen-2020-043671), 2021-03-19
Supplement: bmjopen-2020-043671supp001.pdf [file bmjopen-2020-043671supp001.pdf]

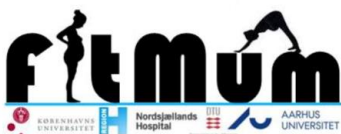

## Informeret samtykke til deltagelse i et sundhedsvidenskabeligt forskningsprojekt

Forskningsprojektets titel: FitMum

### Erklæring fra projektdeltageren:

Jeg har fået skriftlig og mundtlig information og ved nok om formål, metode, fordele og ulemper til at sige ja til at deltage i FitMum.

Jeg ved, at det er frivilligt at deltage, og at jeg altid kan trække mit samtykke tilbage, uden at det vil få konsekvenser for mit videre graviditets-, fødsels- og barselsforløb på Nordsjællands Hospital.

Jeg giver samtykke til at deltage i forskningsprojektet, og har fået en kopi af dette samtykkeark samt en kopi af den skriftlige information om projektet til eget brug.

Navn: \_\_\_\_\_

E-mail: \_\_\_\_\_

Telefonnummer: \_\_\_\_\_

Dato: \_\_\_\_\_ Underskrift: \_\_\_\_\_

Ønsker du at blive informeret om forskningsprojektets resultater samt eventuelle konsekvenser for dig?

Ja  (sæt x)    Nej  (sæt x)

Ønsker du at blive informeret om væsentlige helbredsmæssige fund hos dig?

Ja  (sæt x)    Nej  (sæt x)

### Erklæring fra den, der afgiver information:

Jeg erklærer, at projektdeltageren har modtaget mundtlig og skriftlig information om projektet.

Efter min overbevisning er der givet tilstrækkelig information til, at der kan træffes beslutning om deltagelse i projektet.

Navnet på den, der har afgivet information: \_\_\_\_\_

Dato: \_\_\_\_\_ Underskrift: \_\_\_\_\_
