# Supplementary material for: Structured supervised exercise training or motivational counselling during pregnancy on physical activity level and health of mother and offspring: FitMum study protocol
Source: PubMed Central journal article supplement — BMJ Open. 2021 Mar 19;11(3):e043671. doi: 10.1136/bmjopen-2020-043671 (PMC7986889; doi:10.1136/bmjopen-2020-043671), 2021-03-19
Supplement: bmjopen-2020-043671supp002.pdf [file bmjopen-2020-043671supp002.pdf]

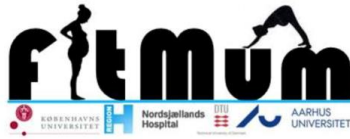

**Informeret samtykke fra forældremyndighedsindehaver(e) til barns deltagelse  
i et sundhedsvidenskabeligt forskningsprojekt  
samt  
informeret samtykke fra biologisk faders deltagelse  
i et sundhedsvidenskabeligt forskningsprojekt**

Forskningsprojektets titel: FitMum

**Erklæring fra indehaver(e) af forældremyndigheden til barns deltagelse:**

Jeg/vi har fået skriftlig og mundtlig information og ved nok om formål, metode, fordele og ulemper til at give mit/vores samtykke til mit/vores barns deltagelse i FitMum. Jeg/vi ved, at det er frivilligt at deltage, og at jeg/vi altid kan trække mit/vores samtykke tilbage, uden at det vil få konsekvenser for det videre graviditets-, fødsels- og barselsforløb på Nordsjællands Hospital.

Jeg/vi giver samtykke til, at mit/vores endnu unavngivne barn deltager i forskningsprojektet, og at der i forbindelse med fødslen udtages navlesnorblod og moderkagevæv, der opbevares i en forskningsbiobank, samt at overskydende biologisk materiale overføres til en biobank til fremtidig forskning. Jeg/vi har fået en kopi af dette samtykkeark samt en kopi af den skriftlige information om projektet til eget brug.

Navnet på forældremyndighedsindehaver a: \_\_\_\_\_

Dato: \_\_\_\_\_ Underskrift: \_\_\_\_\_

Navnet på forældremyndighedsindehaver b: \_\_\_\_\_

Dato: \_\_\_\_\_ Underskrift: \_\_\_\_\_

Ønsker du/I at blive informeret om forskningsprojektets resultater samt eventuelle konsekvenser for dit/jeres barn?

Ja \_\_\_\_\_ (sæt x)    Nej \_\_\_\_\_ (sæt x)

Ønsker du/I at blive informeret om væsentlige helbredsmæssige fund hos dit/jeres barn?

Ja \_\_\_\_\_ (sæt x)    Nej \_\_\_\_\_ (sæt x)

Side 1 af 2

03.12.2018 – version 5. Anmeldelsesnummer Videnskabsetisk Komité: 61462.

**Erklæring fra biologisk fader til egen deltagelse:**

Jeg (biologisk fader) har fået skriftlig og mundtlig information og ved nok om formål, metode, fordele og ulemper til at give mit samtykke til at deltage i FitMum.

Jeg ved, at det er frivilligt at deltage, og at jeg altid kan trække mit samtykke tilbage, uden at det vil få konsekvenser for det videre graviditets-, fødsels- og barselsforløb på Nordsjællands Hospital.

Jeg (biologisk fader) giver samtykke til at deltage i forskningsprojektet og til, at mit biologiske materiale (blod) opbevares i en forskningsbiobank, samt at overskydende biologisk materiale (blod) overføres til en biobank til fremtidig forskning. Jeg har fået en kopi af dette samtykkeark samt en kopi af den skriftlige information om projektet til eget brug.

Navnet på den biologiske fader: \_\_\_\_\_

Dato: \_\_\_\_\_ Underskrift: \_\_\_\_\_

Ønsker du (biologisk fader) at blive informeret om forskningsprojektets resultater samt eventuelle konsekvenser for dig?

Ja  (sæt x)    Nej  (sæt x)

Ønsker du (biologisk fader) at blive informeret om væsentlige helbredsmæssige fund hos dig?

Ja  (sæt x)    Nej  (sæt x)

**Erklæring fra den, der afgiver information:**

Jeg erklærer, at forældremyndighedsindehaver(e) har modtaget mundtlig og skriftlig information om projektet.

Efter min overbevisning er der givet tilstrækkelig information til, at forældremyndighedsindehaver(e) kan træffe beslutning om henholdsvis dit/deres barns og faderens deltagelse i projektet.

Navnet på den, der har afgivet information: \_\_\_\_\_

Dato: \_\_\_\_\_ Underskrift: \_\_\_\_\_
